# Supplementary material
Source: Springer Nature journal article supplement (https://www.springermedizin.de/resource/supplementary/12916_2011_370_MOESM1_ESM.pdf/9599794)

# Cancer Care Trajectory

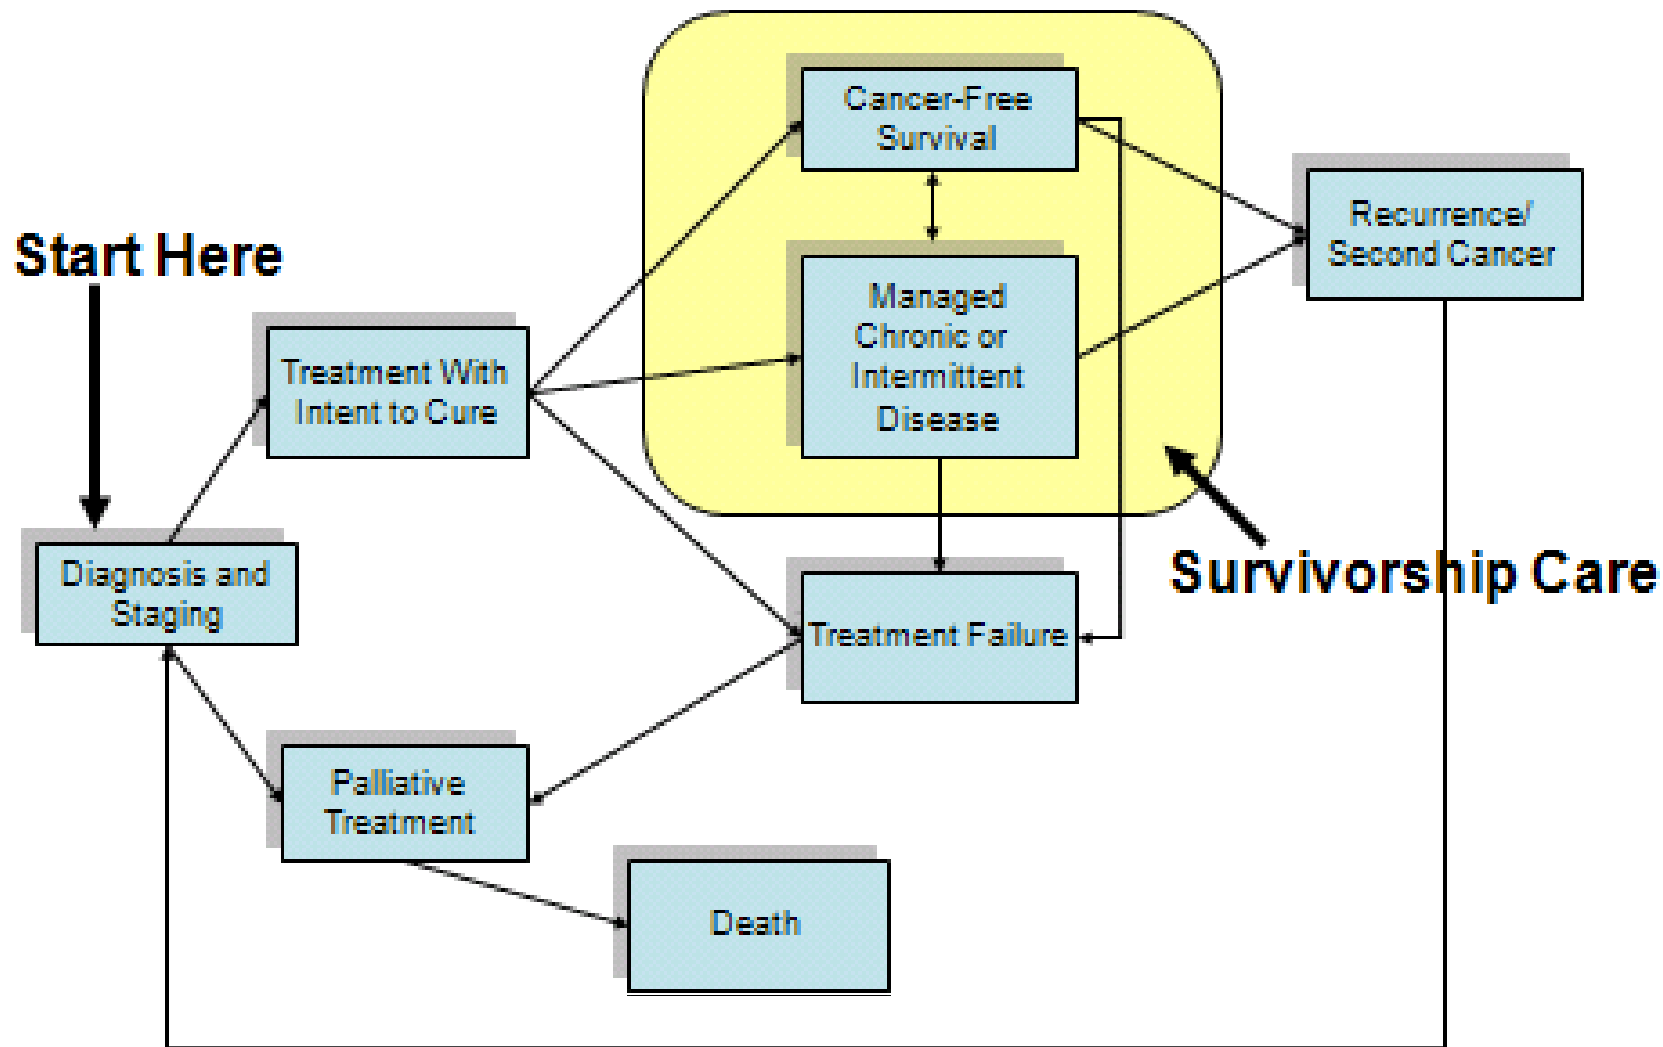

Supplement: MOESM1 [file 9599794]
